# Supplementary material for: Objective Neighborhood-Level Disorder Versus Subjective Safety as Predictors of HIV Transmission Risk and Momentary Well-Being
Source: PubMed Central journal article supplement (PMC11427584; doi:10.1007/s10461-024-04413-z), 2024-07-04
Supplement: 10461_2024_4413_MOESM1_ESM.pdf [file 10461_2024_4413_MOESM1_ESM.pdf]

**Supplementary figures and table for:**

**Objective neighborhood-level disorder versus subjective safety ratings as predictors of HIV transmission risk and momentary well-being**

**Figure S1.** Tree diagram showing the types of networks obtained through the modified-snowball recruiting procedure, in which HIV+ participants recruited participants who could be either HIV+ or HIV-. “Plus” signs in circles: HIV+ participants. “Minus” signs in squares: HIV- participants. Participants who were not in a network within the study (singletons) are not shown. See main Results text for further details.

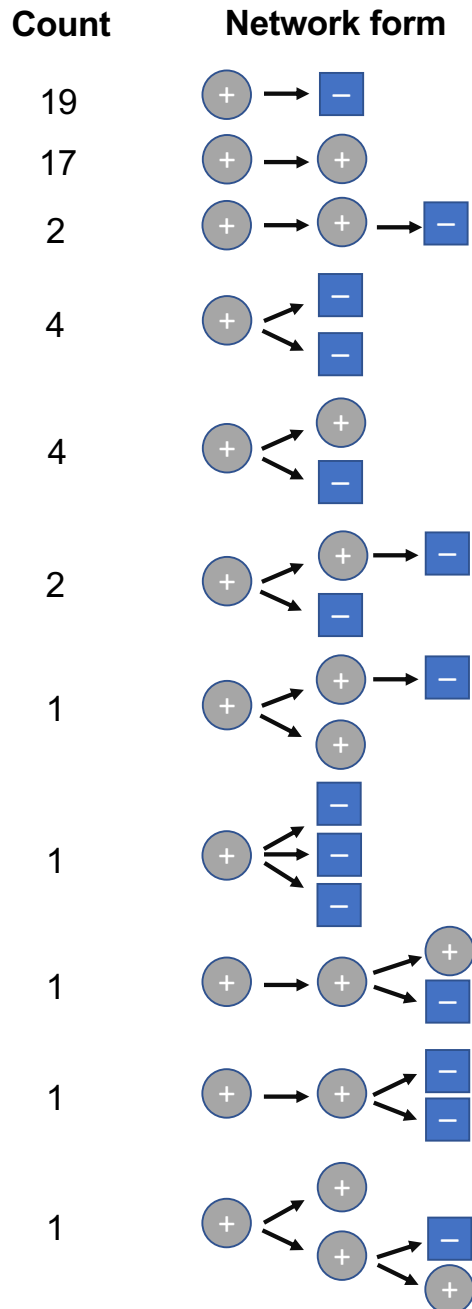

**Figure S2.** Illustration of the relationship between the regressors (objective hazard and subjective safety) and each ordinal outcome, from the same models shown in Figs. 3 and 4. This figure shows the probability of each level of each ordinal outcome, as a function of objective hazard and subjective safety. Lines show the median probability, and confidence bands show the 90% credible intervals.

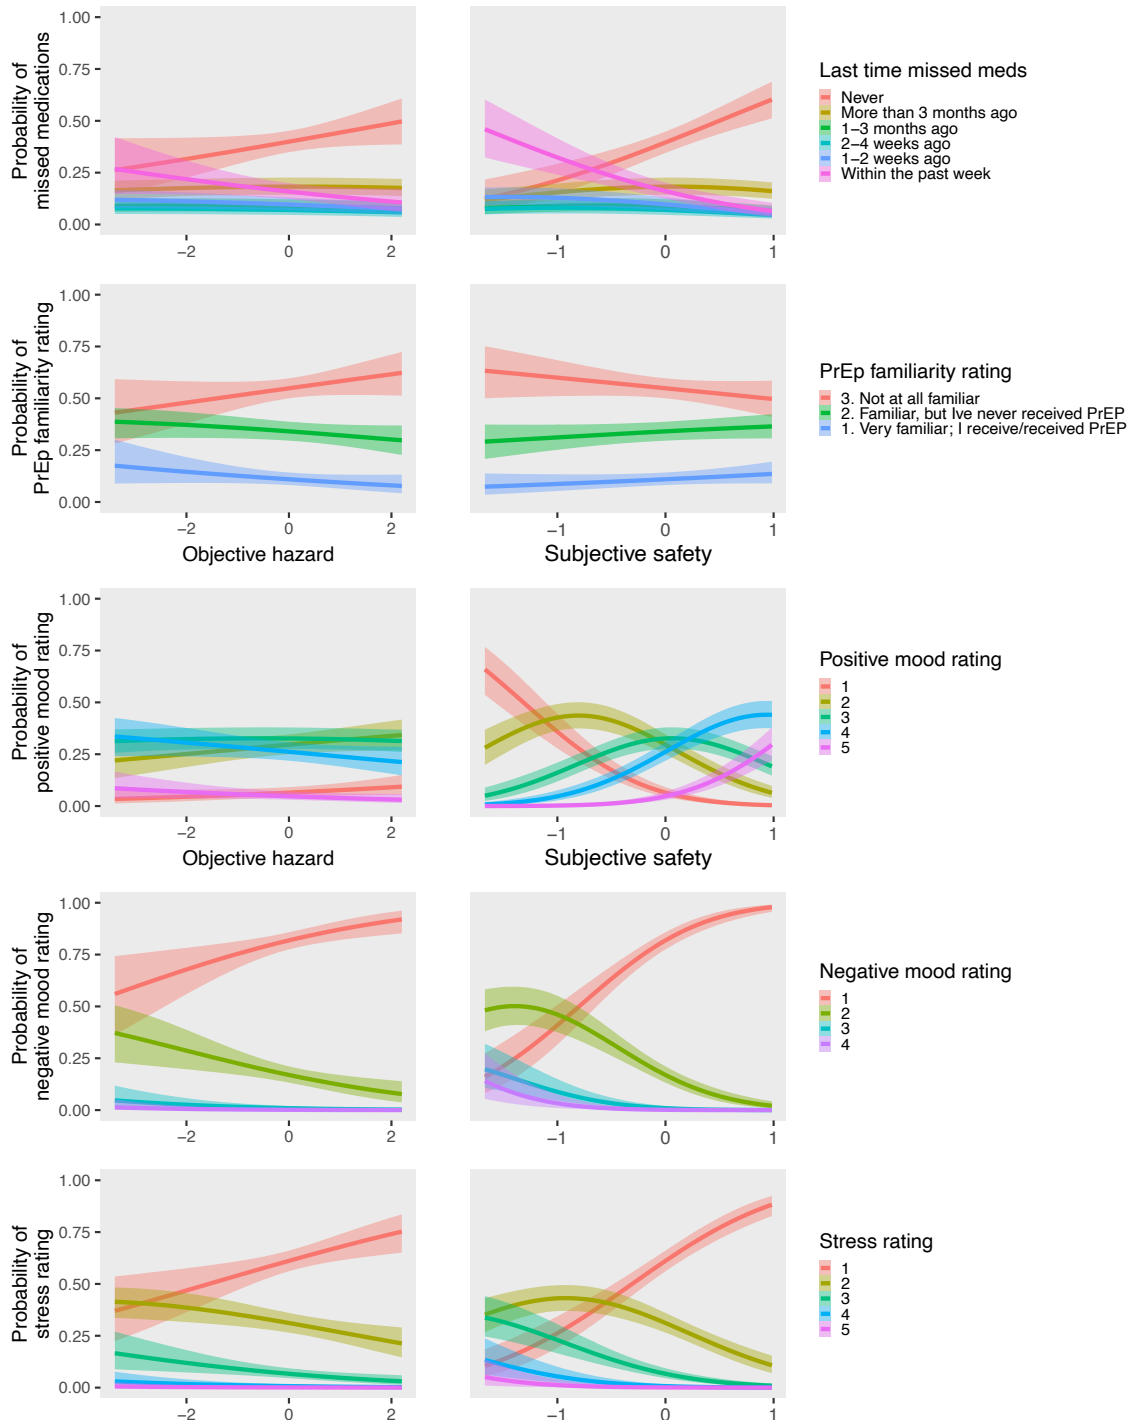

**Table S1.** Coefficient values for all statistical models. Binary outcomes were modeled using the Bernoulli family. Ordinal outcomes were modeled using the cumulative probit family. Abbreviations: N = number of participants; Coef = mean value of the model coefficient; SD = standard deviation of the model coefficient; CI\_low = lower limit of 95% credible interval; CI\_high = upper limit of 95% credible interval; Bayes p = probability that the posterior distribution of the coefficient contains zero.

| <u>Binary Outcome</u>        | <u>N</u> | <u>Parameter</u>  | <u>Coef</u> | <u>SD</u> | <u>CI_low</u> | <u>CI_high</u> | <u>Bayes p</u> |
|------------------------------|----------|-------------------|-------------|-----------|---------------|----------------|----------------|
| Did Not Use Condom           | 167      | Intercept         | -1.13       | 0.18      | -1.44         | -0.84          | <0.0001 ***    |
|                              |          | Objective hazard  | 0.22        | 0.18      | -0.08         | 0.52           | 0.2216         |
|                              |          | Subjective safety | 0.26        | 0.3       | -0.22         | 0.76           | 0.371          |
| Sex with Casual Partner      | 168      | Intercept         | 0.08        | 0.16      | -0.19         | 0.33           | 0.6322         |
|                              |          | Objective hazard  | 0.13        | 0.15      | -0.13         | 0.38           | 0.4133         |
|                              |          | Subjective safety | -0.46       | 0.26      | -0.87         | -0.02          | 0.072 (*)      |
| Had sex for money            | 168      | Intercept         | -0.55       | 0.17      | -0.82         | -0.26          | <0.0001 ***    |
|                              |          | Objective hazard  | -0.38       | 0.17      | -0.66         | -0.11          | 0.0212 *       |
|                              |          | Subjective safety | -0.88       | 0.28      | -1.33         | -0.42          | <0.0001 ***    |
| Partner injects drugs        | 167      | Intercept         | -0.9        | 0.18      | -1.19         | -0.61          | <0.0001 ***    |
|                              |          | Objective hazard  | 0.05        | 0.18      | -0.24         | 0.34           | 0.7803         |
|                              |          | Subjective safety | -0.79       | 0.28      | -1.25         | -0.33          | 0.0051 **      |
| Partner has sex for money    | 166      | Intercept         | -0.86       | 0.18      | -1.15         | -0.57          | <0.0001 ***    |
|                              |          | Objective hazard  | -0.28       | 0.17      | -0.56         | 0.01           | 0.1108         |
|                              |          | Subjective safety | -0.77       | 0.28      | -1.23         | -0.31          | 0.0045 **      |
| Works used by another        | 42       | Intercept         | -0.21       | 0.39      | -0.84         | 0.42           | 0.5883         |
|                              |          | Objective hazard  | 0.16        | 0.32      | -0.38         | 0.69           | 0.6256         |
|                              |          | Subjective safety | -0.97       | 0.55      | -1.86         | -0.04          | 0.0709 (*)     |
| <u>Ordinal outcome</u>       | <u>N</u> | <u>Parameter</u>  | <u>Coef</u> | <u>SD</u> | <u>CI_low</u> | <u>CI_high</u> | <u>Bayes p</u> |
| Time since missed medication | 247      | Threshold[1]      | -0.27       | 0.08      | -0.4          | -0.14          | 0.0011 **      |
|                              |          | Threshold[2]      | 0.2         | 0.08      | 0.06          | 0.33           | 0.0158 *       |
|                              |          | Threshold[3]      | 0.43        | 0.08      | 0.29          | 0.57           | <0.0001 ***    |
|                              |          | Threshold[4]      | 0.64        | 0.09      | 0.5           | 0.79           | <0.0001 ***    |
|                              |          | Threshold[5]      | 0.99        | 0.1       | 0.83          | 1.15           | <0.0001 ***    |
|                              |          | Objective hazard  | -0.11       | 0.07      | -0.23         | 0              | 0.1106         |
|                              |          | Subjective safety | -0.53       | 0.12      | -0.74         | -0.33          | 0              |
| Familiarity with PrEP        | 286      | Threshold[1]      | 0.12        | 0.07      | 0             | 0.24           | 0.101          |
|                              |          | Threshold[2]      | 1.23        | 0.1       | 1.06          | 1.39           | <0.0001 ***    |
|                              |          | Objective hazard  | -0.09       | 0.07      | -0.2          | 0.03           | 0.2107         |
|                              |          | Subjective safety | 0.13        | 0.11      | -0.06         | 0.32           | 0.2549         |
| Positive mood                | 286      | Threshold[1]      | -1.52       | 0.11      | -1.7          | -1.33          | <0.0001 ***    |
|                              |          | Threshold[2]      | -0.35       | 0.08      | -0.49         | -0.22          | <0.0001 ***    |
|                              |          | Threshold[3]      | 0.5         | 0.08      | 0.36          | 0.63           | <0.0001 ***    |
|                              |          | Threshold[4]      | 1.67        | 0.12      | 1.47          | 1.87           | <0.0001 ***    |
|                              |          | Objective hazard  | -0.09       | 0.06      | -0.2          | 0.01           | 0.1551         |
|                              |          | Subjective safety | 1.15        | 0.12      | 0.96          | 1.35           | <0.0001 ***    |
| Negative mood                | 286      | Threshold[1]      | 0.91        | 0.1       | 0.76          | 1.07           | <0.0001 ***    |
|                              |          | Threshold[2]      | 2.29        | 0.19      | 1.98          | 2.6            | <0.0001 ***    |
|                              |          | Threshold[3]      | 2.99        | 0.28      | 2.54          | 3.45           | <0.0001 ***    |
|                              |          | Objective hazard  | -0.22       | 0.09      | -0.36         | -0.08          | 0.0101 *       |
|                              |          | Subjective safety | -1.14       | 0.15      | -1.39         | -0.9           | <0.0001 ***    |
| Stress                       | 286      | Threshold[1]      | 0.28        | 0.08      | 0.15          | 0.41           | <0.0001 ***    |
|                              |          | Threshold[2]      | 1.44        | 0.11      | 1.26          | 1.62           | <0.0001 ***    |
|                              |          | Threshold[3]      | 2.4         | 0.2       | 2.08          | 2.72           | <0.0001 ***    |
|                              |          | Threshold[4]      | 3.2         | 0.36      | 2.61          | 3.76           | <0.0001 ***    |
|                              |          | Objective hazard  | -0.18       | 0.07      | -0.3          | -0.06          | 0.0121 *       |
|                              |          | Subjective safety | -0.92       | 0.12      | -1.12         | -0.71          | <0.0001 ***    |
